# Supplementary material for: A DFT+U study of A-site and B-site substitution in BaFeO3−δ
Source: Royal Society of Chemistry journal article supplement (doi:10.1039/c5cp02694f), 2015-01-01
Supplement: c5cp02694f1.pdf [file c5cp02694f1.pdf]

## Supplementary Figures and Tables

### 1. Projected Density of States

The projected density of states for defect formation of  $Y_{Ba}$ ,  $Y_{Fe}$ ,  $Ce_{Ba}$ , and  $Ce_{Fe}$  defects in BFO, shows similar trends to defect formation in  $La_{Ba}$  and  $La_{Fe}$  structures. Specifically,  $A_{Ba}$  defects are show a shift in the Fermi level of the O 2p states to higher energies, suggesting hole reduction  $B_{Fe}$  defects show little effect on O 2p states.

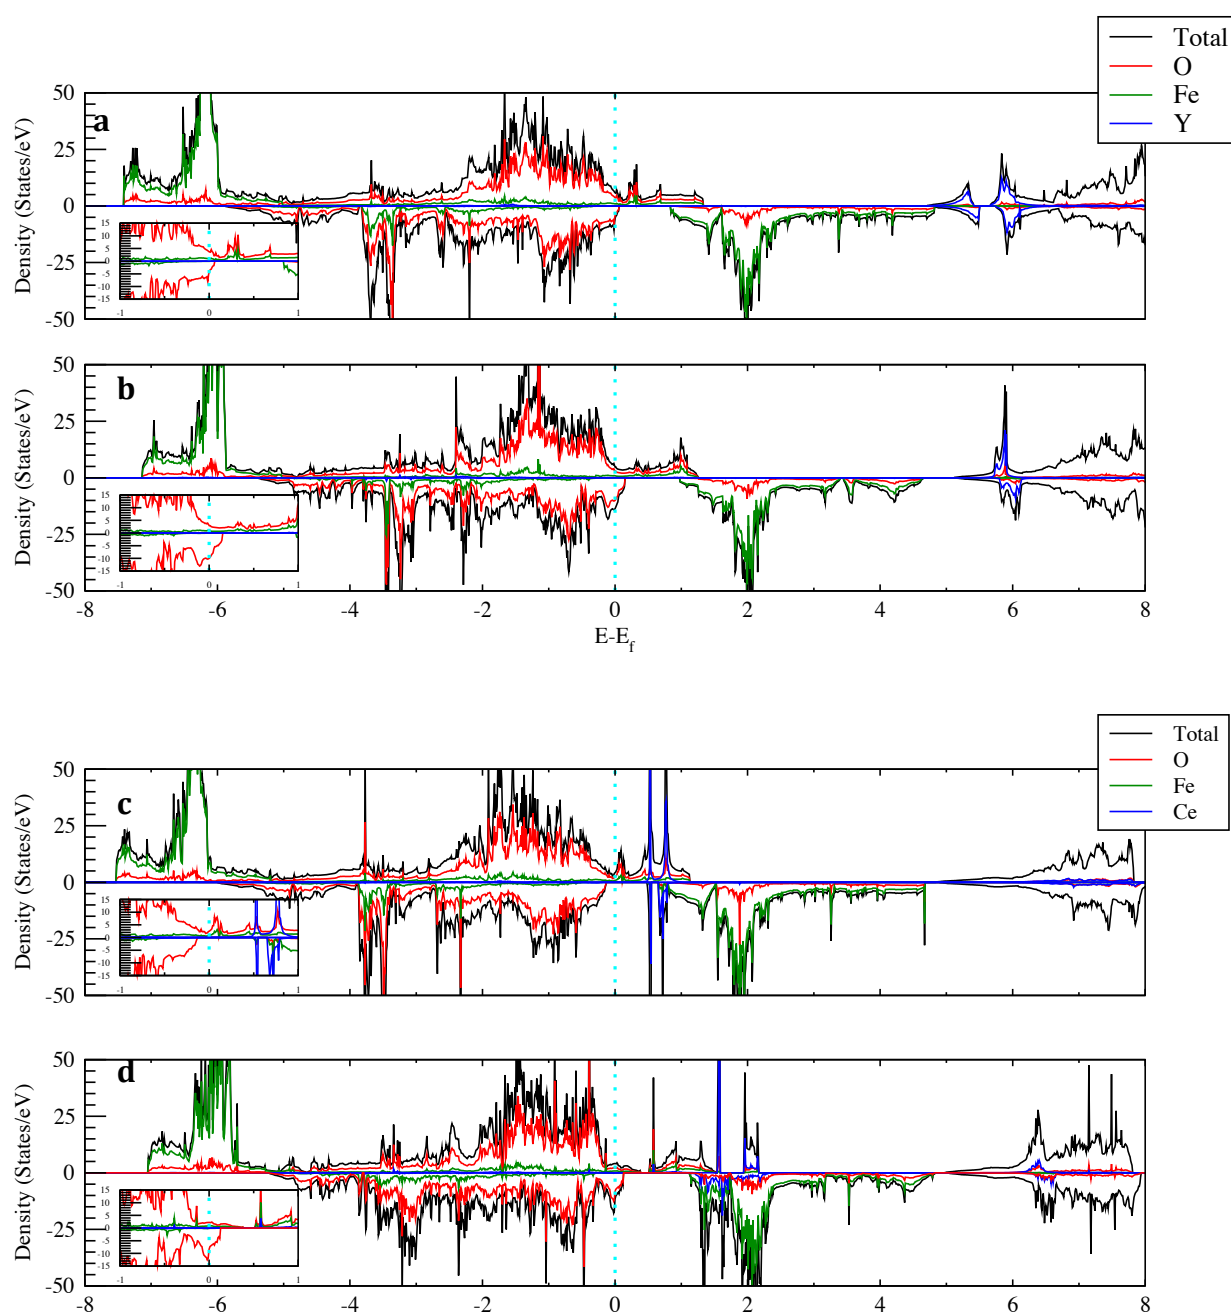

Figure S1 Projected Fe, O, Y & Ce, and total density of states of  $BaFeO_3$  with a)  $Y_{Ba}$ , b)  $Y_{Fe}$ , c)  $Ce_{Ba}$  and, d)  $Ce_{Fe}$  substitutions. The dashed cyan line corresponds to Fermi energy and insets show Fermi-level detail.

## 2. Bader Charge Analysis for Oxygen Vacancy formation

Bader charge analysis of oxygen vacancy formation for all  $\text{Ce}_{\text{Ba}}$ ,  $\text{Ce}_{\text{Fe}}$ ,  $\text{Y}_{\text{Ba}}$  and  $\text{Y}_{\text{Fe}}$  defects in BFO, shows a the same trend for charge redistribution with oxygen vacancy formation as observed for  $\text{La}_{\text{Ba}}$  and  $\text{La}_{\text{Fe}}$  structures. That is, a predominant localisation of additional charge to O sub-lattice for  $\text{B}_{\text{Fe}}$  defects, and significant localisation of dopant charge to A-manifold for  $\text{A}_{\text{Ba}}$  defects

Table S1. Bader charge  $q(e)$ , Magnetic moment of Fe  $\mu_{\text{Fe}}(\mu_B)$  for the stoichiometric structures of BFO and BFO with  $\text{Ce}_{\text{Ba}}$ ,  $\text{Ce}_{\text{Fe}}$ ,  $\text{Y}_{\text{Ba}}$  and  $\text{Y}_{\text{Fe}}$  defects.  $\delta=0$  corresponds to stoichiometric structure and  $\delta=0.125$  corresponds to a single oxygen vacancy. To note Bader chargers for oxygen vacancy structures, are for the optimum oxygen vacancy sites, as discussed in the manuscript.

| Property                         | $\text{Ce}_{\text{Ba}}$ |                  | $\text{Ce}_{\text{Fe}}$ |                  | $\text{Y}_{\text{Ba}}$ |                  | $\text{Y}_{\text{Fe}}$ |                  |
|----------------------------------|-------------------------|------------------|-------------------------|------------------|------------------------|------------------|------------------------|------------------|
|                                  | $\delta = 0$            | $\delta = 0.125$ | $\delta = 0$            | $\delta = 0.125$ | $\delta = 0$           | $\delta = 0.125$ | $\delta = 0$           | $\delta = 0.125$ |
| $\mu_{\text{Fe}}^{\text{a}}$     | 3.92                    | 4.05             | 3.77                    | 3.82             | 3.88                   | 4.00             | 3.79                   | 3.88             |
| $\mu_{\text{Fe}^*}^{\text{a},b}$ | ---                     | 3.81             | ---                     | 3.85             | ---                    | 3.74             | ---                    | 3.54             |
| $q_{\text{Fe}}^{\text{a}}$       | 1.83                    | 1.82             | 1.74                    | 1.76             | 1.83                   | 1.79             | 1.70                   | 1.75             |
| $q_{\text{Fe}^*}^{\text{a},b}$   | ---                     | 1.68             | ---                     | 1.71             | ---                    | 1.67             | ---                    | 1.76             |
| $q_{\text{Ba}}^{\text{a}}$       | 1.59                    | 1.55             | 1.57                    | 1.56             | 1.58                   | 1.55             | 1.59                   | 2.56             |
| $q_{\text{A/B}}^{\text{a}}$      | 2.20                    | 2.38             | 2.26                    | 2.26             | 2.21                   | 2.54             | 2.12                   | 2.13             |
| $q_{\text{O}}^{\text{a}}$        | -1.16                   | -1.20            | -1.12                   | -1.17            | -1.17                  | -1.18            | -1.11                  | -1.17            |

<sup>a</sup> To note Bader chargers for oxygen vacancy structures, are for the optimum oxygen vacancy sites, as discussed in the manuscript. <sup>b</sup> Fe\* indicates the Fe ions adjacent to the vacancy.
